# Supplementary material for: Plasma-induced black bismuth tungstate as a photon harvester for photocatalytic carbon dioxide conversion
Source: Royal Society of Chemistry journal article supplement (doi:10.1039/d0nj05082b), 2020-12-10
Supplement: d0nj05082b1.pdf [file d0nj05082b1.pdf]

## *Supporting information*

### **Plasma-induced black bismuth tungstate as a photon harvester for photocatalytic carbon dioxide conversion**

*Kang Zhong,<sup>a</sup> Anqi Zhou,<sup>a</sup> Guli Zhou,<sup>a</sup> Qidi Li,<sup>a</sup> Jinman Yang,<sup>a</sup> Zhaolong Wang,<sup>a</sup>  
Xingwang Zhu,<sup>a</sup> Junchao Qian,<sup>b</sup> Yingjie Hua,<sup>c</sup> Huaming Li<sup>\*a</sup> and Hui Xu<sup>\*a</sup>*

<sup>a</sup> School of Chemistry and Chemical Engineering, Institute for Energy Research, Jiangsu University, Zhenjiang, 212013, China.

<sup>b</sup> School of Chemistry, Biology and Materials Engineering, Suzhou University of Science and Technology, Suzhou 215009, Jiangsu, China

<sup>c</sup> the Key Laboratory of Electrochemical Energy Storage and Energy Conversion of Hainan Province, School of Chemistry and Chemical Engineering, Hainan Normal University, Haikou, 571158, China

<sup>\*</sup>Corresponding author.

E-mail: lihm@ujs.edu.cn (H. Li), xh@ujs.edu.cn (H. Xu)

## **Characterization**

The X-ray diffraction (XRD) with Cu K $\alpha$  ( $\lambda = 1.5418 \text{ \AA}$ ) as a source is a Shimadzu XRD-6100 diffractometer, which was used to characterize phases structures of the as-prepared photocatalysts. The range of  $2\theta$  is from  $10^\circ$  to  $80^\circ$ , and the scan rate is  $0.1167^\circ \text{ s}^{-1}$ . The photocatalyst morphology was observed by field emission scanning electron microscope (FE-SEM, JEOL-JSM-7001F, Japan) and transmission electron microscope (200 kV) with an accelerating voltage of 10kV. X-ray photoelectron spectroscopy (XPS) of the photocatalyst was obtained by using an ESCALab MKII spectrometer with 20 kV of Mg K $\alpha$  radiation. Ultraviolet-visible diffuse reflectance spectra (UV-vis DRS) was performed to measure the optical properties of the as-prepared photocatalysts by using a UV-vis spectrophotometer (Shimadzu UV-2450, Japan). A QuantaMaster and TimeMaster Spectrofluorometer was used to investigate photoluminescence (PL) spectroscopy. In-situ FTIR spectra were obtained by using a Thermo Scientific Nicolet iS50.

## **Photoelectrochemical measurement**

An electrochemical workstation of 760B (CHI760B, Chenhua Instrument Company, Shanghai, China) was performed on for electrochemical measurement using a three-electrode system. Photocurrent and electrochemical impedance spectroscopy (EIS) measurements of samples were carried out on it. In the three-electrode system of electrochemical workstation, the reference electrode was a saturated calomel electrode (SCE), and the platinum wire was used as the counter electrode. The working electrode was prepared as follows: 5 mg photocatalyst powder dispersed in 1 mL ethanol solution,

then 20  $\mu\text{L}$  suspended coated in  $10 \times 5$  mm indium-tin-oxide (ITO) glass and dried for  $60^\circ\text{C}$  to remove ethanol for 12 h. Put above three electrodes into the electrolyte solution of 0.2 M  $\text{Na}_2\text{SO}_4$ . The light source is a 300 W Xe lamp (PLS-SXE3, Beijing Perfectlight). At room temperature, started electrochemical measurement applied no voltage between the electrodes.

### **Photocatalytic $\text{CO}_2$ reduction evaluation**

Photocatalytic  $\text{CO}_2$  reduction was carried out on a photoreaction system (Labsolar-6A, Beijing Perfectlight, Fig. S8). The powder (10 mg) catalyst was dissolved in a 300 mL reactor with a quartz glass cover, including 2 mL of TEOA as sacrificial electron donor, 4 mL of deionized water, and 6 mL of MeCN. Ultrasound the prepared solution at room temperature for 10 min. Connect the reactor to the photoreaction system. After the air in the reaction system was cleared away, high-purity  $\text{CO}_2$  was introduced into the system until the pressure reached 70 kPa and circulated for 60 min to achieve uniform distribution of  $\text{CO}_2$  gas. The temperature of photocatalytic  $\text{CO}_2$  reduction was set at  $5^\circ\text{C}$  by the cooling water circulation system, promoting the adsorption of  $\text{CO}_2$ . A 300 W Xe lamp (PLS-SXE3, Beijing Perfectlight) was employed as the light source. A gas chromatograph (GC2002, KeChuang, Shanghai) equipped with thermal conductivity detector (TCD) and hydrogen flame ionized detector (FID) was used to determine the amount of the gas product.

**Table S1.** Comparison of the performances with other catalysts for photocatalytic CO<sub>2</sub> reduction

| Light source               | Catalyst                                                        | Reaction medium                     | Products        | Activity                                       | Reference        |
|----------------------------|-----------------------------------------------------------------|-------------------------------------|-----------------|------------------------------------------------|------------------|
| <b>300 W Xe lamp</b>       | <b>Bi<sub>2</sub>WO<sub>6</sub></b>                             | <b>Liquid-solid, water and TEOA</b> | <b>CO</b>       | <b>56.5 μmol g<sup>-1</sup> h<sup>-1</sup></b> | <b>This Work</b> |
| 300 W Xe lamp              | Ti <sub>3</sub> C <sub>2</sub> /Bi <sub>2</sub> WO <sub>6</sub> | Liquid-solid, water                 | CH <sub>4</sub> | 1.78 μmol g <sup>-1</sup> h <sup>-1</sup>      | [1]              |
| 300 W Xe lamp              | BiOBr/ACSs                                                      | Liquid-solid, water                 | CO              | 23.74 μmol g <sup>-1</sup> h <sup>-1</sup>     | [2]              |
| 300 W Xe lamp              | BiOIO <sub>3</sub>                                              | Liquid-solid, water                 | CO              | 6.30 μmol g <sup>-1</sup> h <sup>-1</sup>      | [3]              |
| 300 W Xe lamp              | Bi <sub>4</sub> O <sub>5</sub> Br <sub>2</sub>                  | Gas-solid, water                    | CO              | 3.16 μmol g <sup>-1</sup> h <sup>-1</sup>      | [4]              |
| visible light (λ > 420 nm) | BVO/C/Cu <sub>2</sub> O                                         | Gas-solid, water                    | CO              | 3.01 μmol g <sup>-1</sup> h <sup>-1</sup>      | [5]              |

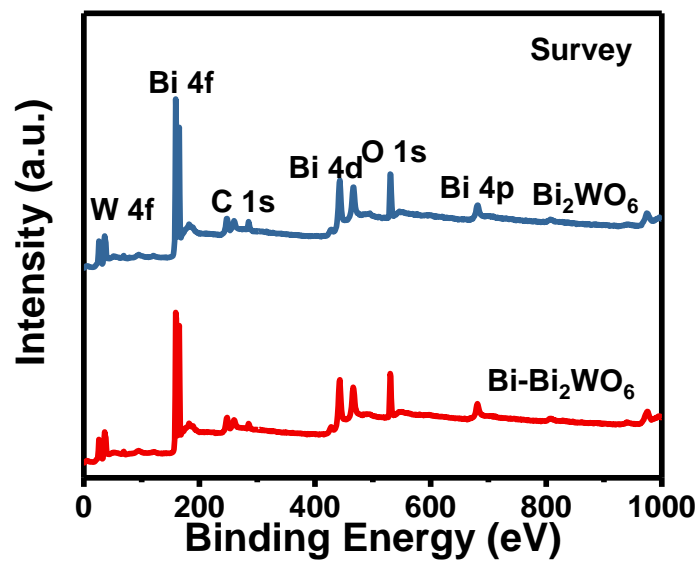

Fig. S1 XPS spectra of original  $\text{Bi}_2\text{WO}_6$  and 6-BT.

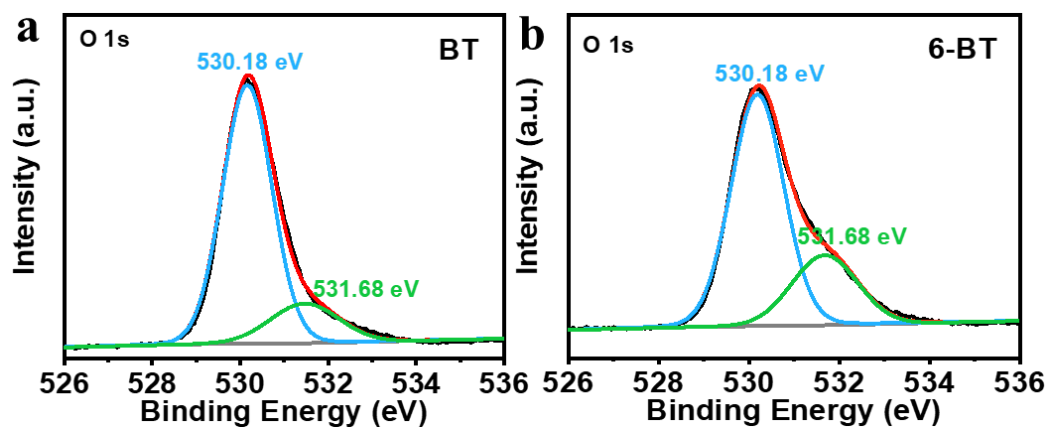

Fig. S2 XPS high-resolution spectra of (a) O 1s of BT and (b) O 1s of 6-BT.

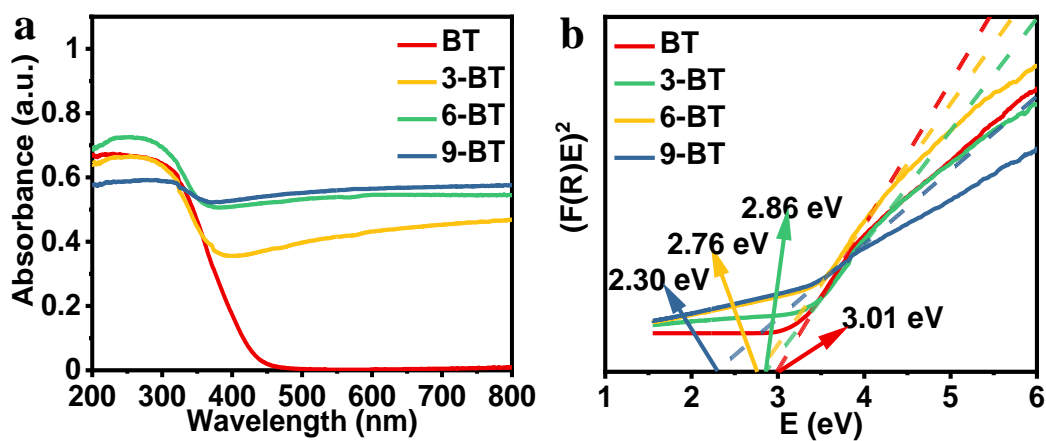

Fig. S3 (a) UV-vis diffuse reflection spectrum and (b) estimated bandgap of BT and X-BT (X=3, 6, 9).

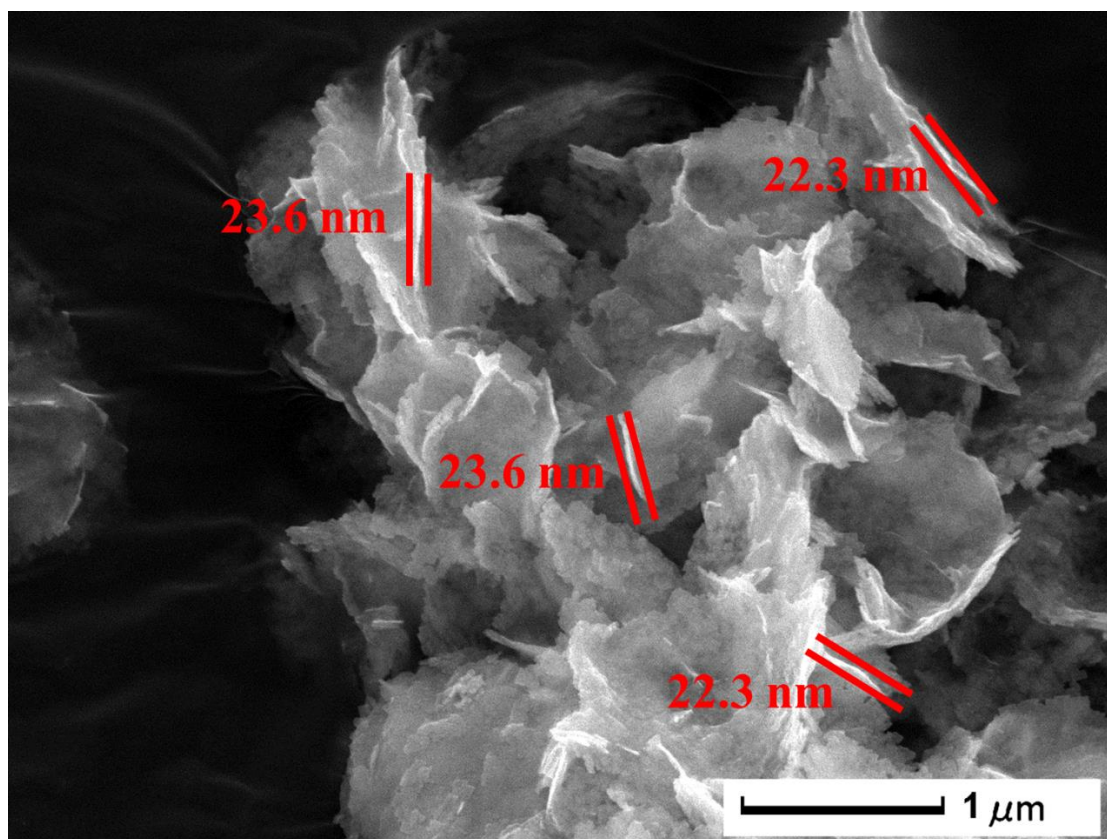

**Fig. S4** SEM image of 6-BT.

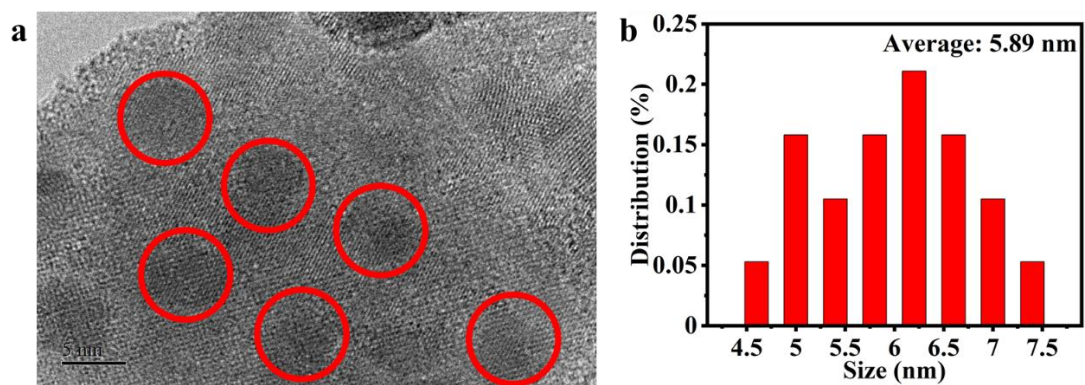

**Fig. S5** HRTEM image (a) and Bi QDs size distribution (b) of 6-BT.

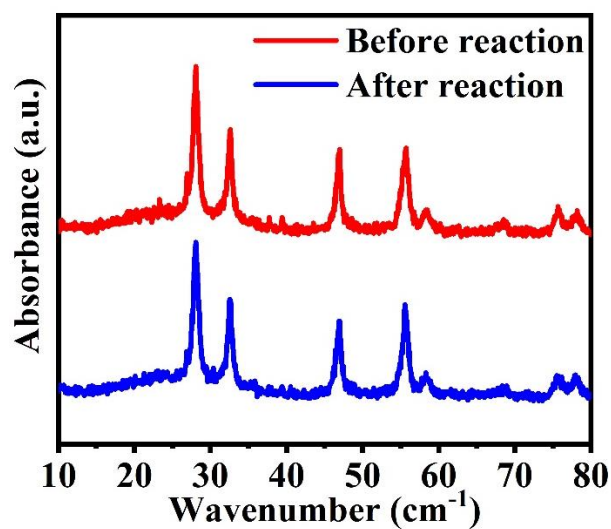

**Fig. S6** XRD patterns of 6-BT before and after the photocatalytic  $\text{CO}_2$  reduction reaction.

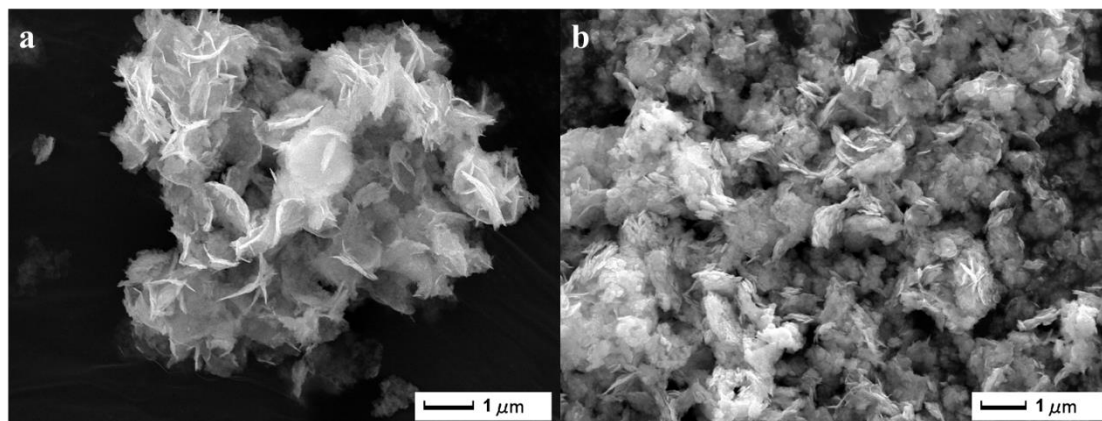

**Fig. S7** SEM images of 6-BT before (a) and after (b) the photocatalytic  $\text{CO}_2$  reduction reaction.

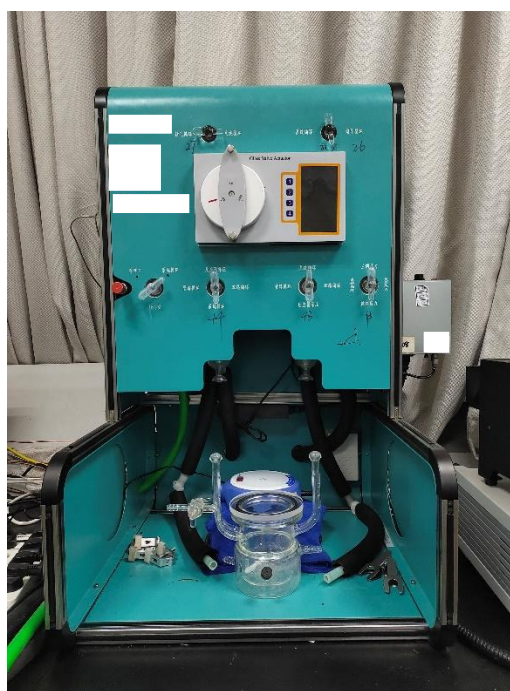

**Fig. S8** Photo of photocatalytic reaction equipment.

## Reference

1. S. Cao, B. Shen, T. Tong, J. Fu and J. Yu, *Adv. Funct. Mater.*, 2018, **28**, 1800136.
2. K. Liu, X. Zhang, C. Zhang, G. Ren, Z. Zheng, Z. Lv and C. Fan, *RSC Adv.*, 2019, **9**, 14391-14399.
3. H. Huang, F. Chen, A. H. Reshak, S. Auluck and Y. Zhang, *Appl. Surf. Sci.*, 2018, **458**, 129-138.
4. X. Jin, C. Lv, X. Zhou, H. Xie, S. Sun, Y. Liu, Q. Meng and G. Chen, *Nano Energy*, 2019, **64**, 103955.
5. C. Kim, K. M. Cho, A. Al-Saggaf, I. Gereige and H.-T. Jung, *ACS Catal.*, 2018, **8**, 4170-4177.
